# Supplementary material for: Sustainable Recovery of Valuable Nanoporous Materials from High-Chlorine MSWI Fly Ash by Ultrasound with Organic Acids
Source: MDPI journal article supplement (doi:10.3390/molecules27072289), 2022-03-31
Supplement: s1 [file s1]

## Supplement Data

Sustainable recovery of valuable nanoporous materials from high-chlorine MSWI fly ash by ultrasound with organic acids

Thanh Tam Nguyen<sup>1,2\*</sup>, Cheng-Kuo Tsai<sup>3</sup>, Jao-Jia Horng<sup>3\*</sup>

1. Faculty of Environment, University of Science (VNUHCM), Ho Chi Minh City 700000, Vietnam.
2. Vietnam National University Ho Chi Minh City, Ho Chi Minh City 700000, Vietnam.
3. Department of Safety, Health, and Environmental Engineering, National Yunlin University of Science and Technology, Yunlin 64002, Taiwan.

Table S1. ANOVA for Cl removal performance of Citric acid

| <i>Cl removal performance of Citric Acid – Analysis of variance</i> |                   |                |       |                             |
|---------------------------------------------------------------------|-------------------|----------------|-------|-----------------------------|
| Source                                                              | Degree of freedom | Sum of Squares | F     | Percentage Contribution (%) |
| A                                                                   | 3                 | 7.328          | 0.80  | 3.342                       |
| B                                                                   | 3                 | 8.557          | 0.94  | 3.902                       |
| C                                                                   | 3                 | 200.88         | 22.06 | 91.61                       |
| D                                                                   | 3                 | 2.493          | 0.27  | 1.136                       |

Table S2. ANOVA for Cl removal performance of Ascorbic acid

| <i>Cl removal performance of Ascorbic Acid – Analysis of variance</i> |                   |                |       |                             |
|-----------------------------------------------------------------------|-------------------|----------------|-------|-----------------------------|
| Source                                                                | Degree of freedom | Sum of Squares | F     | Percentage Contribution (%) |
| A                                                                     | 3                 | 2.646          | 1.06  | 2.205                       |
| B                                                                     | 3                 | 5.454          | 2.18  | 4.546                       |
| C                                                                     | 3                 | 109.27         | 43.58 | 91.07                       |
| D                                                                     | 3                 | 2.608          | 1.04  | 2.173                       |

Table S3. ANOVA for Cl removal performance of EDTA-Na<sub>2</sub>

| <i>Cl removal performance of EDTA-Na<sub>2</sub> – Analysis of variance</i> |                   |                |       |                              |
|-----------------------------------------------------------------------------|-------------------|----------------|-------|------------------------------|
| Source                                                                      | Degree of freedom | Sum of Squares | F     | Percentages Contribution (%) |
| A                                                                           | 3                 | 0.449          | 0.68  | 2.564                        |
| B                                                                           | 3                 | 0.472          | 0.72  | 2.694                        |
| C                                                                           | 3                 | 16.24          | 24.73 | 92.73                        |
| D                                                                           | 3                 | 0.352          | 0.54  | 2.009                        |

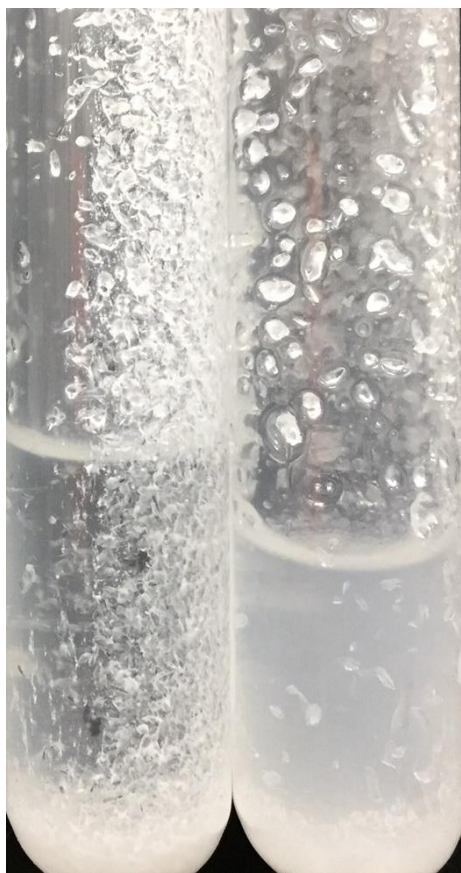

Figure S1. Crystallization of leachate
